# TABLE OF CONTENTS

# ANESTHESIOLOGY

|                                                  |     |
|--------------------------------------------------|-----|
| ◇ This Month in ANESTHESIOLOGY .....             | 1A  |
| Science, Medicine, and the Anesthesiologist..... | 13A |
| Infographics in ANESTHESIOLOGY.....              | 17A |

## ◆ Editorial Views

### Trusted Evidence: Discovery to Practice

E. D. Kharasch..... 1

### CME Anesthesia and Cancer Recurrence: Context for Divergent Study Outcomes

D. I. Sessler and B. Riedel..... 3

### Succinylcholine and Dantrolene: Inseparable in the Emergency Cupboard?

P. M. Hopkins..... 6

### Mechanical Power: A Biomarker for the Lung?

L. Brochard and A. Bersten..... 9

## Practice Parameters

|                                                                                                                                                                                                                                                                                                                          |    |
|--------------------------------------------------------------------------------------------------------------------------------------------------------------------------------------------------------------------------------------------------------------------------------------------------------------------------|----|
| ◇ Practice Advisory for Perioperative Visual Loss Associated with Spine Surgery 2019: An Updated Report by the American Society of Anesthesiologists Task Force on Perioperative Visual Loss, the North American Neuro-Ophthalmology Society, and the Society for Neuroscience in Anesthesiology and Critical Care ..... | 12 |
| SUPPLEMENTAL DIGITAL CONTENT IS AVAILABLE IN THE TEXT                                                                                                                                                                                                                                                                    |    |

## Perioperative Medicine

### CLINICAL SCIENCE

|                                                                                                                                                                                                               |    |
|---------------------------------------------------------------------------------------------------------------------------------------------------------------------------------------------------------------|----|
| CME ◆ ◆ Total Intravenous Anesthesia versus Inhalation Anesthesia for Breast Cancer Surgery: A Retrospective Cohort Study<br>S. Yoo, H.-B. Lee, W. Han, D.-Y. Noh, S.-K. Park, W. H. Kim, and J.-T. Kim ..... | 31 |
|---------------------------------------------------------------------------------------------------------------------------------------------------------------------------------------------------------------|----|

In a large propensity-matched retrospective cohort analysis, the authors compared total IV and volatile anesthesia for breast cancer surgery. Recurrence hazard was similar with each approach. Selection of IV or volatile anesthesia should be based on factors other than cancer recurrence.

### ◆ Succinylcholine Use and Dantrolene Availability for Malignant Hyperthermia Treatment: Database Analyses and Systematic Review

M. G. Larach, T. T. Klumpner, B. W. Brandom, M. T. Vaughn, K. G. Belani, A. Herlich, T. W. Kim, J. Limoncelli, S. Riazi, E. L. Sivak, J. Capacchione, D. Mashman, and S. Kheterpal, on behalf of the Multicenter Perioperative Outcomes Group..... 41

The authors performed an analysis of data from three databases and a systematic literature review. Providers frequently use succinylcholine, including during difficult mask ventilation. Succinylcholine given without volatile anesthetics triggered 24 malignant hyperthermia events, 13 of which were treated with dantrolene. Fourteen patients experienced substantial complications, and one died. Delayed dantrolene treatment worsened patient outcomes. **SUPPLEMENTAL DIGITAL CONTENT IS AVAILABLE IN THE TEXT**

### ◆ Norepinephrine Infusion for Preventing Postspinal Anesthesia Hypotension during Cesarean Delivery: A Randomized Dose-finding Trial

A. M. Hasanin, S. M. Amin, N. A. Agiza, M. K. Elsayed, S. Refaat, H. A. Hussein, T. I. Rouk, M. Alrahmany, M. E. Elsayad, K. A. Elshafaei, and A. Refaie..... 55

This randomized, double-blinded trial compared prophylactic norepinephrine infusions of 0.025, 0.050, or 0.075  $\mu\text{g} \cdot \text{kg}^{-1} \cdot \text{min}^{-1}$ , started after bupivacaine spinal anesthesia, in full-term parturients having elective cesarean delivery. The primary outcome, maternal hypotension (systolic blood pressure less than 80% of baseline), occurred less frequently after both 0.050 and 0.075  $\mu\text{g} \cdot \text{kg}^{-1} \cdot \text{min}^{-1}$  compared 0.025  $\mu\text{g} \cdot \text{kg}^{-1} \cdot \text{min}^{-1}$  norepinephrine.

### ◆ Cognitive Effects of Perioperative Pregabalin: Secondary Exploratory Analysis of a Randomized Placebo-controlled Study

M. Myhre, H. B. Jacobsen, S. Andersson, and A. Stubhaug..... 63

This secondary analysis of data demonstrating that perioperative administration of pregabalin was associated with a reduction in opioid requirements and incisional hyperalgesia suggests that these benefits may be compromised by an increased risk of developing impaired postoperative cognitive performance.

◇ Refers to This Month in Anesthesiology  
◆ Refers to Editorial Views

 This article has an Audio Podcast  
 See Supplemental Digital Content

CME  CME Article  
 This article has a Video Abstract

 Part of the Letheon writing competition  
 This article has a Visual Abstract

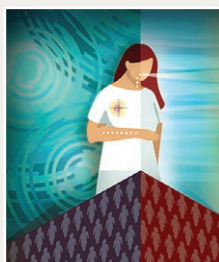

**ON THE COVER:** The association between type of anesthesia and recurrence of cancer remains controversial. In this issue of ANESTHESIOLOGY, Yoo *et al.* examine the association of type of anesthesia with recurrence-free survival after breast cancer surgery. In an accompanying Editorial View, Sessler and Riedel review the broader scientific literature regarding the association between choice of anesthesia and cancer recurrence and places this new report in perspective. Illustration by Annemarie Johnson, Vivo Visuals.

- Yoo *et al.*: Total Intravenous Anesthesia versus Inhalation Anesthesia for Breast Cancer Surgery: A Retrospective Cohort Study, p. 31
- Sessler and Riedel: Anesthesia and Cancer Recurrence: Context for Divergent Study Outcomes, p. 3

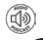

### Triple-low Alerts Do Not Reduce Mortality: A Real-time Randomized Trial

D. I. Sessler, A. Turan, W. H. Stapelfeldt, E. J. Mascha, D. Yang, E. Farag, J. Cywinski, C. Vlah, T. Kopyeva, A. L. Keebler, M. Perilla, M. Ramachandran, S. Drahuschak, K. Kaple, and A. Kurz .....72

A randomized electronic alert of triple-low events to treating clinicians did not reduce 90-day mortality. The alerts minimally influenced clinician responses, assessed as vasopressor administration or reduction in end-tidal volatile anesthetic partial pressure, and there was no association between response to alerts and mortality. Triple-low events predict mortality but do not appear to be causally related.

### Major Adverse Cardiac Events and Mortality Associated with Electroconvulsive Therapy: A Systematic Review and Meta-analysis

A. Duma, M. Maleczek, B. Panjikaran, H. Herkner, T. Garrison, and P. Nagele .....83

Major adverse cardiac events and death after electroconvulsive therapy are infrequent and occur in about 1 of 50 patients and after about 1 of 200 to 500 electroconvulsive therapy treatments. *SUPPLEMENTAL DIGITAL CONTENT IS AVAILABLE IN THE TEXT*

### Blood Pressure and End-tidal Carbon Dioxide Ranges during Aneurysm Occlusion and Neurologic Outcome after an Aneurysmal Subarachnoid Hemorrhage

A. Akkermans, J. A. van Waes, L. M. Peelen, G. J. Rinkel, and W. A. van Klei .....92

The investigators retrospectively evaluated 1,099 patients who had endovascular coiling or surgical clipping for subarachnoid hemorrhages. There were no clinically important or statistical significant associations between either end-tidal carbon dioxide or mean arterial pressure thresholds and Glasgow Outcome Scale at discharge or three months. Other prognostic factors are more important than carbon dioxide and blood pressure, at least within the observed clinical ranges. *SUPPLEMENTAL DIGITAL CONTENT IS AVAILABLE IN THE TEXT*

## BASIC SCIENCE

### Activation of Parabrachial Nucleus Glutamatergic Neurons Accelerates Reanimation from Sevoflurane Anesthesia in Mice

T.-X. Wang, B. Xiong, W. Xu, H.-H. Wei, W.-M. Qu, Z.-Y. Hong, and Z.-L. Huang .....106

Using chemogenetic techniques, activation of parabrachial nucleus glutamatergic neurons prolonged anesthetic induction and hastened emergence in mice. Inhibition of these neurons provided opposite effects. Modulating the activity of arousal centers may provide an approach to controlling the duration of general anesthesia.

## Critical Care Medicine

### BASIC SCIENCE

### Positive End-expiratory Pressure and Mechanical Power

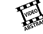

F. Collino, F. Rapetti, F. Vasques, G. Maiolo, T. Tonetti, F. Romitti, J. Niewenhuys, T. Behnemann, L. Camporota, G. Hahn, V. Reupke, K. Holke, P. Herrmann, E. Duscio, F. Cipulli, O. Moerer, J. J. Marini, M. Quintel, and L. Gattinoni .....119

This *in vivo* study (36 pigs mechanically ventilated in the prone position) suggests that low levels of positive end-expiratory pressure reduce injury associated with atelectasis, and above a threshold level of power, positive end-expiratory pressure causes lung injury and adverse hemodynamics. *SUPPLEMENTAL DIGITAL CONTENT IS AVAILABLE IN THE TEXT*

## Pain Medicine

### CLINICAL SCIENCE

### Analgesic Effects of Hydromorphone versus Buprenorphine in Buprenorphine-maintained Individuals

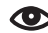

A. S. Huhn, E. C. Strain, G. E. Bigelow, M. T. Smith, R. R. Edwards, and D. A. Tompkins .....131

Large doses of intravenous hydromorphone can provide analgesia in buprenorphine-maintained individuals. However, the use of hydromorphone for analgesia in buprenorphine-maintained individuals confers greater abuse liability and side effects than does supplemental intravenous buprenorphine.

## Education

### CLASSIC PAPERS REVISITED

### Identifying and Treating Opioid Side Effects: The Development of Methylnaltrexone

J. Moss .....142

### IMAGES IN ANESTHESIOLOGY

### Pulmonary Thromboembolism

D. H. Jablonka, A. Srinivasan, A. J. Schwartz, and R. Subramanyam .....149

*SUPPLEMENTAL DIGITAL CONTENT IS AVAILABLE IN THE TEXT*

### Double-chambered Right Ventricle

J. S. McNeil, J. E. Vergales, A. J. Bechtel, and A. M. Kleiman .....150

*SUPPLEMENTAL DIGITAL CONTENT IS AVAILABLE IN THE TEXT*

### Repair of a Giant Ascending Aortic Pseudoaneurysm Requiring Awake Institution of Cardiopulmonary Bypass

S. A. Dunn, O. Aljure, T. Salerno, and Y. F. Rodriguez-Blanco .....152

*SUPPLEMENTAL DIGITAL CONTENT IS AVAILABLE IN THE TEXT*

|                                                                                              |     |
|----------------------------------------------------------------------------------------------|-----|
| Pneumoperitoneum after Cardiopulmonary Resuscitation<br><i>T. Keverian and S. Bose</i> ..... | 153 |
|----------------------------------------------------------------------------------------------|-----|

## REVIEW ARTICLE

|                                                                                                                                                                                                                        |     |
|------------------------------------------------------------------------------------------------------------------------------------------------------------------------------------------------------------------------|-----|
| ◇ Why Money Alone Can't (Always) "Nudge" Physicians: The Role of Behavioral Economics in the Design of Physician Incentives<br><i>D. A. Lubarsky, M. T. French, H. S. Gitlow, L. F. Rosen, and S. G. Ullmann</i> ..... | 154 |
|------------------------------------------------------------------------------------------------------------------------------------------------------------------------------------------------------------------------|-----|

Despite the widespread application of incentive systems in health care to enhance physician productivity and quality, they have not been well studied and often do not produce the desired results.

## MIND TO MIND

|                                                                                                                                                                                     |     |
|-------------------------------------------------------------------------------------------------------------------------------------------------------------------------------------|-----|
|  Winner Announced: The Letheon 2nd Annual Creative Writing Competition<br><i>S. T. Harvey</i> ..... | 171 |
|  Visitor<br><i>J. P. Davies</i> .....                                                               | 172 |

## Correspondence

|                                                                                                                                             |     |
|---------------------------------------------------------------------------------------------------------------------------------------------|-----|
| Association and Effect of Opioid Abuse—Related Readmission<br><i>E. G. Pivalizza</i> .....                                                  | 174 |
| In Reply<br><i>A. Gupta, J. Nizamuddin, D. Elmofti, S. L. Nizamuddin, A. Tung, M. Minhaj, A. Mueller, J. Apfelbaum, and S. Shahul</i> ..... | 174 |

|                                       |     |
|---------------------------------------|-----|
| Reviews of Educational Material ..... | 176 |
|---------------------------------------|-----|

|                     |     |
|---------------------|-----|
| Announcements ..... | 178 |
|---------------------|-----|

## Anesthesiology Reflections From The Wood Library-Museum

|                                                                                                                     |     |
|---------------------------------------------------------------------------------------------------------------------|-----|
| The Patent Trail from Etherist W. T. G. Morton to Laughing-Gas Pioneer G. Q. Colton<br><i>George S. Bause</i> ..... | 8   |
| Laughing "Gas Administered": A Deathbed Blotter from Bucharest's Horace David<br><i>George S. Bause</i> .....       | 82  |
| Missouri's New York Dental Rooms: Advertising Laughing Gas in English and German<br><i>George S. Bause</i> .....    | 91  |
| Morphine, Cocaine, and the Euthanasia of King George V<br><i>George S. Bause</i> .....                              | 105 |
| From "Secret Preparation" to "Vitalized Air": Doctored Nitrous Oxide<br><i>George S. Bause</i> .....                | 130 |
| Anesthetic Powers?: Whiskey for Neonatal Surgery in 1934 Kansas City<br><i>George S. Bause</i> .....                | 151 |

|                        |     |
|------------------------|-----|
| Careers & Events ..... | 19A |
|------------------------|-----|

## INSTRUCTIONS FOR AUTHORS

The most recently updated version of the Instructions for Authors is available at [www.anesthesiology.org](http://www.anesthesiology.org). Please refer to the Instructions for the preparation of any material for submission to ANESTHESIOLOGY.

Manuscripts submitted for consideration for publication must be submitted in electronic format. The preferred method is via the Journal's Web site (<http://www.anesthesiology.org>). Detailed directions for submissions and the most recent version of the Instructions for Authors can be found on the Web site (<http://www.anesthesiology.org>). Books and educational materials should be sent to Alan Jay Schwartz, M.D., M.S.Ed., Director of Education, Department of Anesthesiology and Critical Care Medicine, The Children's Hospital of Philadelphia, 34th Street and Civic Center Blvd., Room 9327, Philadelphia, Penn-

sylvania 19104-4399. Article-specific permission requests are managed with Copyright Clearance Center's Rightslink service. Information can be accessed directly from articles on the journal Web site. More information is available at <http://anesthesiology.pubs.asahq.org/public/rightsandpermissions.aspx>. For questions about the Rightslink service, e-mail [customer care@copyright.com](mailto:customer care@copyright.com) or call 877-622-5543 (U.S. only) or 978-777-9929. Advertising and related correspondence should be addressed to Advertising Manager, ANESTHESIOLOGY, Wolters Kluwer Health, Inc., Two Commerce Square, 2001 Market Street, Philadelphia, Pennsylvania 19103 (Web site: <http://www.wkcenter.com/>). Publication of an advertisement in ANESTHESIOLOGY does not constitute endorsement by the Society or Wolters Kluwer Health, Inc. of the product or service described therein or of any representations made by the advertiser with respect to the product or service.

**ANESTHESIOLOGY** (ISSN 0003-3022) is published monthly by Wolters Kluwer Health, Inc., 14700 Citicorp Drive, Bldg 3, Hagerstown, MD 21742. Business office: Two Commerce Square, 2001 Market Street, Philadelphia, PA 19103. Periodicals postage paid at Hagerstown, MD, and at additional mailing offices. Copyright © 2018, the American Society of Anesthesiologists, Inc.

**Annual Subscription Rates:** *United States*—\$930 Individual, \$2054 Institution, \$374 In-training. *Rest of World*—\$981 Individual, \$2281 Institution, \$374 In-training. Single copy rate \$207. Subscriptions outside of North America must add \$55 for airfreight delivery. Add state sales tax, where applicable. The GST tax of 7% must be added to all orders shipped to Canada (Wolters Kluwer Health, Inc.'s GST Identification #895524239, Publications Mail Agreement #1119672). Indicate in-training status and name of institution. Institution rates apply to libraries, hospitals, corporations, and partnerships of three or more individuals. Subscription prices outside the United States must be prepaid. Prices subject to change without notice. Subscriptions will begin with currently available issue unless otherwise requested. Visit us online at [www.lww.com](http://www.lww.com).

Individual and in-training subscription rates include print and access to the online version. Online-only subscriptions for individuals (\$308) and persons in training (\$308) are available to nonmembers and may be ordered by downloading a copy of the Online Subscription FAXback Form from the Web site, completing the information requested, and faxing the completed form to 301-223-2400. Institutional rates are for print only; online subscriptions are available via Ovid. Institutions can choose to purchase a print and online subscription together for a discounted rate. Institutions that wish to purchase a print subscription, please contact Wolters Kluwer Health, Inc., 14700 Citicorp Drive, Bldg 3, Hagerstown, MD 21742; phone: 800-638-3030; fax: 301-223-2400. Institutions

that wish to purchase an online subscription or online with print, please contact the Ovid Regional Sales Office near you or visit [www.ovid.com/site/index.jsp](http://www.ovid.com/site/index.jsp) and select Contact and Locations.

**Address for non-member subscription information, orders, or change of address** (except Japan): Wolters Kluwer Health, Inc., 14700 Citicorp Drive, Bldg 3, Hagerstown, MD 21742; phone: 800-638-3030; fax: 301-223-2400. In Japan, contact Wolters Kluwer Health Japan Co., Ltd., Forecase Mita Building 5th floor, 1-3-31 Mita Minato-ku, Tokyo, Japan 108-0073; phone: +81 3 5427 1969; e-mail: [journal@wjkjapan.co.jp](mailto:journal@wjkjapan.co.jp).

**Address for member subscription information, orders, or change of address:** Members of the American Society of Anesthesiologists receive the print and online journal with their membership. To become a member or provide a change of address, please contact the American Society of Anesthesiologists, 1061 American Lane, Schaumburg, Illinois 60173-4973; phone: 847-825-5586; fax: 847-825-1692; e-mail: [membership@ASAhq.org](mailto:membership@ASAhq.org). For all other membership inquiries, contact Wolters Kluwer Health, Inc., Customer Service Department, P.O. Box 1610, Hagerstown, MD 21740; phone: 800-638-3030; fax: 301-223-2400.

**Postmaster:** Send address changes to ANESTHESIOLOGY, P.O. BOX 1610, Hagerstown, MD 21740.

**Advertising:** Please contact Hilary Druker, Advertising Field Sales Representative, Health Learning, Research & Practice, Medical Journals, Wolters Kluwer Health, Inc.; phone: 609-304-9187; e-mail: [Hilary.Druker@wolterskluwer.com](mailto:Hilary.Druker@wolterskluwer.com). For classified advertising: Dave Wiegand, Recruitment Advertising Representative, Wolters Kluwer Health, Inc., Two Commerce Square, 2001 Market Street, Philadelphia, PA 19103; phone: 847-361-6128; e-mail: [Dave.Wiegand@wolterskluwer.com](mailto:Dave.Wiegand@wolterskluwer.com).
